# Supplementary material for: Concise methods for the synthesis of chiral polyoxazolines and their application in asymmetric hydrosilylation
Source: publisher site journal article supplement (doi:10.3762/bjoc.6.29), 2010-03-25

## Supporting Information

### **Concise methods for the synthesis of chiral polyoxazolines and their application in asymmetric hydrosilylation**

Wei Jie Li<sup>\*1</sup>, Zun Le Xu<sup>2</sup> and Sheng Xiang Qiu<sup>1</sup>

Address: <sup>1</sup>Program for Natural Product Chemical Biology & Drug Discovery, South China Botanical Garden, Chinese Academy of Sciences, 723 Xingke Road, Tianhe District, Guangzhou 510650, China and <sup>2</sup>Department of Applied Chemistry, School of Chemistry and Chemical Engineering, Sun Yat-Sen University, 135 Xingang West Road, Haizhou District, Guangzhou 510275, China

Email: Wei Jie Li - [weijieli1688@yahoo.com.cn](mailto:weijieli1688@yahoo.com.cn)

\* Corresponding author

Data for the hydrosilylation products of aromatic ketones (**8a–8h**)

**(S)-1-Phenylethanol:** 84% yield; HPLC analysis (Daicel Chiralcel OJ-H, 5% *i*-PrOH/hexane, 0.5 mL/min;  $t_r$  (major) = 22.5,  $t_r$  (minor) = 25.4) gave the isomeric composition of the product: 97% ee;  $[\alpha]_D^{20}$  -49.8 (*c* 1.0, CH<sub>2</sub>Cl<sub>2</sub>); <sup>1</sup>H NMR (300 MHz, CDCl<sub>3</sub>): δ 1.35 (d, *J* = 6.79 Hz, 3H), 3.08 (br s, 1H), 4.71 (q, *J* = 6.04, 6.79 Hz, 1H), 7.15–7.23 (m, 5H) ppm; ESI-MS, *m/z* (%): 123 ([M+H]<sup>+</sup>, 100); Anal. Calcd for C<sub>8</sub>H<sub>10</sub>O: C, 78.65; H, 8.25. Found: C, 78.32; H, 8.45.

**(R)-1-Phenylethanol:** 86% yield; HPLC analysis (Daicel Chiralcel OJ-H, 2% *i*-PrOH/hexane, 1.0 mL/min;  $t_r$  (major) = 10.6,  $t_r$  (minor) = 13.2) gave the isomeric composition of the product: 89% ee;  $[\alpha]_D^{20}$  +43.6 (*c* 1.0, CH<sub>2</sub>Cl<sub>2</sub>); <sup>1</sup>H NMR (300 MHz, CDCl<sub>3</sub>): δ 1.37 (d, *J* = 6.79 Hz, 3H), 3.05 (br s, 1H), 4.76 (q, *J* = 6.04, 6.79 Hz, 1H), 7.18–7.40 (m, 5H) ppm; ESI-MS, *m/z* (%): 123 ([M+H]<sup>+</sup>, 100); Anal. Calcd for C<sub>8</sub>H<sub>10</sub>O: C, 78.65; H, 8.25. Found: C, 78.15; H, 8.52.

**(S)-1-(2-Naphthyl)ethanol:** 85% yield; HPLC analysis (Daicel Chiralcel OD-H, 2% *i*-PrOH/hexane, 1.0 mL/min;  $t_r$  (major) = 21.7,  $t_r$  (minor) = 23.6) gave the isomeric composition of the product: 94% ee;  $[\alpha]_D^{20}$  -41.7 (*c* 1.0, CHCl<sub>3</sub>); <sup>1</sup>H NMR (300 MHz, CDCl<sub>3</sub>): δ 1.54 (d, *J* = 6.79 Hz, 3H), 2.16 (br s, 1H), 5.03 (q, *J* = 6.04, 6.79 Hz, 1H), 7.41–7.48 (m, 3H), 7.76–7.83 (m, 4H) ppm; ESI-MS, *m/z* (%): 173 ([M+H]<sup>+</sup>, 100); Anal. Calcd for C<sub>12</sub>H<sub>12</sub>O: C, 83.69; H, 7.02. Found: C, 83.31; H, 7.24.

**(S)-1-Phenylpropanol:** 86% yield; HPLC analysis (Daicel Chiralcel OD-H, 4% *i*-PrOH/hexane, 0.5 mL/min;  $t_r$  (minor) = 17.4,  $t_r$  (major) = 20.4) gave the isomeric composition of the product: 94% ee;  $[\alpha]_D^{20}$  -37.0 (*c* 0.50, CHCl<sub>3</sub>); <sup>1</sup>H NMR (300

MHz, CDCl<sub>3</sub>):  $\delta$  0.88 (t,  $J$  = 7.55 Hz, 3H), 1.65–1.81 (m, 2H), 1.96 (br s, 1H), 4.53 (t,  $J$  = 6.79 Hz, 1H), 7.21–7.30 (m, 5H) ppm; ESI-MS,  $m/z$  (%): 137 ([M+H]<sup>+</sup>, 100); Anal. Calcd for C<sub>9</sub>H<sub>12</sub>O: C, 79.37; H, 8.88. Found: C, 79.12; H, 8.97.

**(S)-1-(2-Methylphenyl)ethanol:** 89% yield; HPLC analysis (Daicel Chiralcel OB-H, 3% *i*-PrOH/hexane, 0.5 mL/min;  $t_r$  (major) = 14.6,  $t_r$  (minor) = 22.2) gave the isomeric composition of the product: 93% ee;  $[\alpha]_D^{20}$  -50.8 ( $c$  0.05, C<sub>2</sub>H<sub>5</sub>OH); <sup>1</sup>H NMR (300 MHz, CDCl<sub>3</sub>):  $\delta$  1.43 (d,  $J$  = 6.04 Hz, 3H), 1.85 (br s, 1H), 2.32 (s, 3H), 5.10 (q,  $J$  = 6.04, 6.79 Hz, 1H), 7.09–7.23 (m, 3H), 7.48 (d,  $J$  = 7.55 Hz, 1H) ppm; ESI-MS,  $m/z$  (%): 137 ([M+H]<sup>+</sup>, 100); Anal. Calcd for C<sub>9</sub>H<sub>12</sub>O: C, 79.37; H, 8.88. Found: C, 79.05; H, 9.11.

**(S)-1-(4-Methylphenyl)ethanol:** 81% yield; HPLC analysis (Daicel Chiralcel OJ-H, 5% *i*-PrOH/hexane, 0.7 mL/min;  $t_r$  (major) = 10.9,  $t_r$  (minor) = 12.4) gave the isomeric composition of the product: 96% ee;  $[\alpha]_D^{20}$  -54.1 ( $c$  0.05, CHCl<sub>3</sub>); <sup>1</sup>H NMR (300 MHz, CDCl<sub>3</sub>):  $\delta$  1.45 (d,  $J$  = 6.79 Hz, 3H), 2.18 (br s, 1H), 2.36 (s, 3H), 4.82 (q,  $J$  = 6.04, 6.79 Hz, 1H), 7.15 (d,  $J$  = 8.30 Hz, 2H), 7.24 (d,  $J$  = 8.30 Hz, 2H) ppm; ESI-MS,  $m/z$  (%): 137 ([M+H]<sup>+</sup>, 100); Anal. Calcd for C<sub>9</sub>H<sub>12</sub>O: C, 79.37; H, 8.88. Found: C, 79.21; H, 8.92.

**(S)-1-(2-Chlorophenyl)ethanol:** 71% yield; HPLC analysis (Daicel Chiralcel OD-H, 2% *i*-PrOH/hexane, 0.8 mL/min;  $t_r$  (minor) = 16.6,  $t_r$  (major) = 17.8) gave the isomeric composition of the product: 90% ee;  $[\alpha]_D^{20}$  -57.2 ( $c$  0.05, CHCl<sub>3</sub>); <sup>1</sup>H NMR (300 MHz, CDCl<sub>3</sub>):  $\delta$  1.38 (d,  $J$  = 6.79 Hz, 3H), 3.57 (br s, 1H), 5.18 (q,  $J$  = 6.04, 6.79 Hz), 7.10–7.25 (m, 3H), 7.49 (d,  $J$  = 7.55 Hz, 1H) ppm; ESI-MS,  $m/z$  (%): 157

([M+H]<sup>+</sup>, 100); Anal. Calcd for C<sub>8</sub>H<sub>9</sub>ClO: C, 61.35; H, 5.79. Found: C, 61.14; H, 5.95.

**(S)-1-(4-Chlorophenyl)ethanol:** 76% yield; HPLC analysis (Daicel Chiralcel OJ-H, 5% *i*-PrOH/hexane, 0.5 mL/min; t<sub>r</sub> (major) = 22.3, t<sub>r</sub> (minor) = 26.0) gave the isomeric composition of the product: 94% ee; [α]<sub>D</sub><sup>20</sup> -48.8 (*c* 0.06, C<sub>2</sub>H<sub>5</sub>OC<sub>2</sub>H<sub>5</sub>); <sup>1</sup>H NMR (300 MHz, CDCl<sub>3</sub>): δ 1.44 (d, *J* = 6.79 Hz, 3H), 2.42 (br s, 1H), 4.81 (q, *J* = 6.04, 6.79 Hz, 1H), 7.25–7.28 (m, 4H) ppm; ESI-MS, *m/z* (%): 157 ([M+H]<sup>+</sup>, 100); Anal. Calcd for C<sub>8</sub>H<sub>9</sub>ClO: C, 61.35; H, 5.79. Found: C, 61.23; H, 5.88.

**(S)-1-(4-Bromophenyl)ethanol:** 79% yield; HPLC analysis (Daicel Chiralcel OJ-H, 5% *i*-PrOH/hexane, 0.5 mL/min; t<sub>r</sub> (major) = 22.2, t<sub>r</sub> (minor) = 24.1) gave the isomeric composition of the product: 96% ee; [α]<sub>D</sub><sup>20</sup> -37.6 (*c* 0.06, CHCl<sub>3</sub>); <sup>1</sup>H NMR (300 MHz, CDCl<sub>3</sub>): δ 1.38 (d, *J* = 6.04 Hz, 3H), 2.73 (br s, 1H), 4.77 (q, *J* = 6.04, 6.79 Hz, 1H), 7.15 (d, *J* = 8.30 Hz, 2H), 7.42 (d, *J* = 9.06 Hz, 2H) ppm; ESI-MS, *m/z* (%): 202 ([M+H]<sup>+</sup>, 100); Anal. Calcd for C<sub>8</sub>H<sub>9</sub>BrO: C, 47.79; H, 4.51. Found: C, 47.35; H, 4.63.

# Copies of <sup>1</sup>H NMR and MS spectra for ligands (1-7)

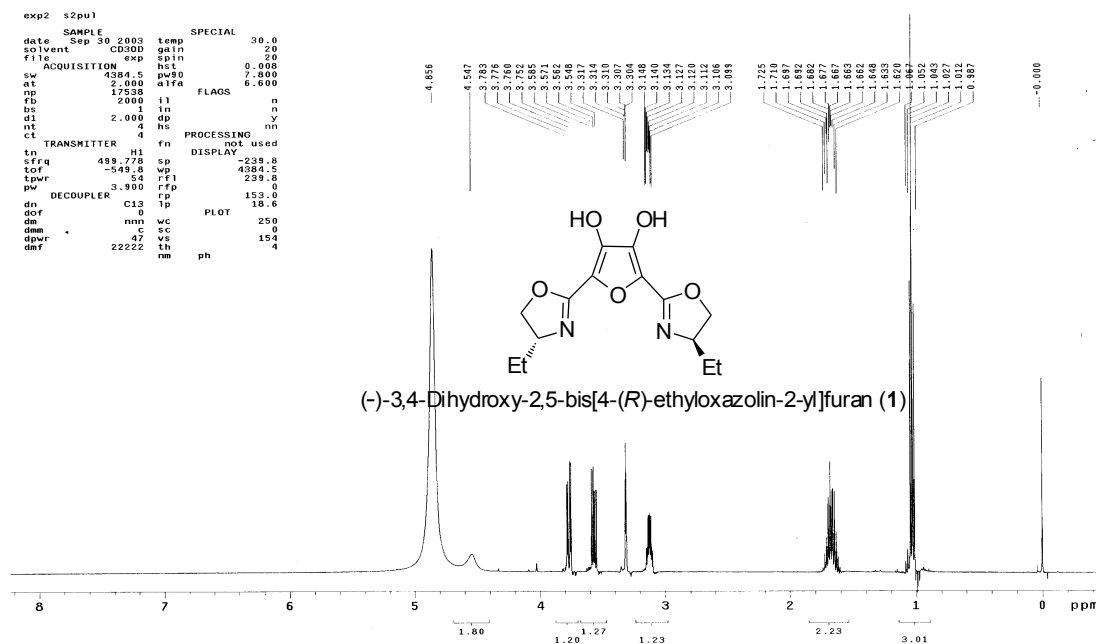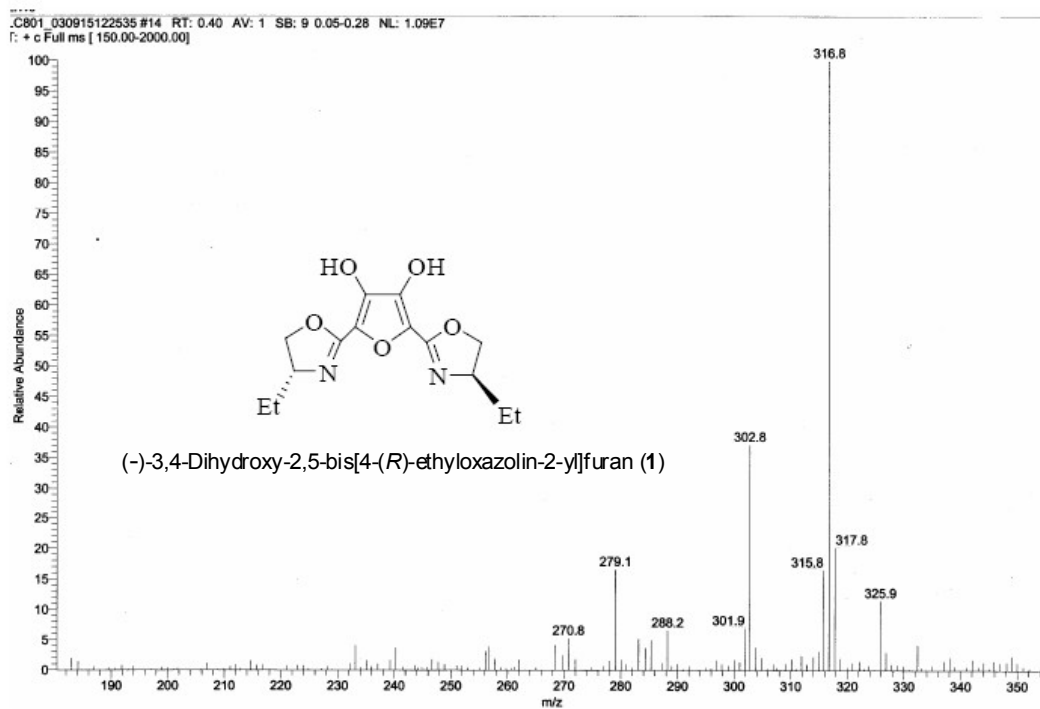

V2284h-LC893  
exp2 s2pp1

|             |             |            |          |
|-------------|-------------|------------|----------|
| date        | OCT 30 2003 | temp       | 28.0     |
| solvent     | DMSO        | gain       | 30       |
| file        | exp         | spin       | 20       |
| Acquisition | exp         | a nsk      |          |
| sw          | 5071.7      | pufo       | 7.830    |
| at          | 2.880       | alfa       | 0        |
| np          | 22880       | IT         | FLAG     |
| fu          | 3000        | in         | n        |
| bc          | 1           | in         | n        |
| dl          | 3.000       | dp         | y        |
| nt          | 0           | hs         | nn       |
| ct          | 0           | PROCESsing | nn       |
| tn          | TRANSMITTER | tn         | not used |
| sfrq        | 400.147     | sp         | -477.0   |
| tof         | -126.1      | wp         | 3073.4   |
| tpwr        | 5.0         | rfl        | 477.0    |
| pw          | 4.000       | rff        | 0        |
| DECOUPLER   | 0           | rp         | -4.7     |
| dn          | C13         | tp         | 10.1     |
| dof         | 0           | PLOT       |          |
| ds          | mm          | WC         | 200      |
| dsm         | C           | SC         | 0        |
| dpar        | 47          | VC         | 140      |
| dwt         | 22222       | th         | 5        |
|             | nm          | ph         |          |

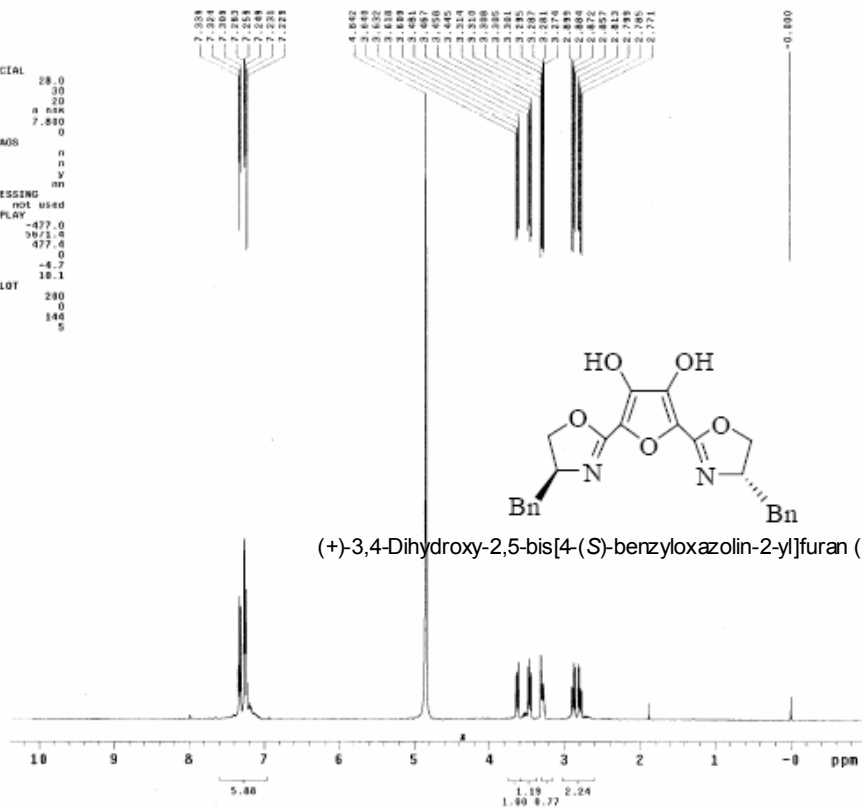

Lc803 #96 RT: 2.88 AV: 1 NL: 1.24E7  
T: +c Full ms [150.00-2000.00]

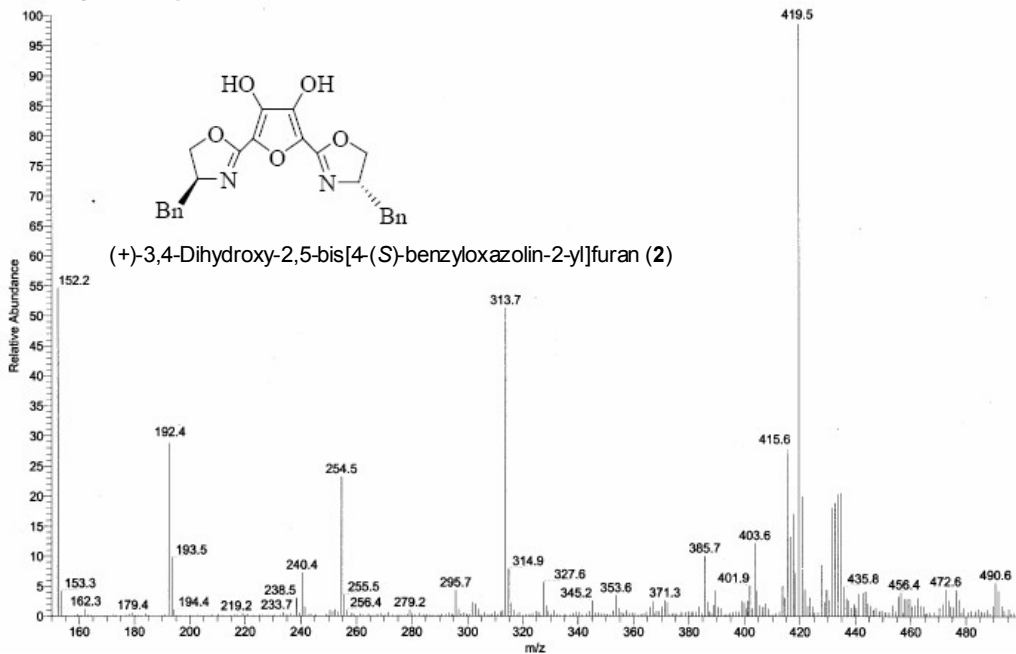



```

exp2 12pu1
SAMPLE SPECIAL 26.0
date Dec 8 2003 temp 26.0
solvent CDCl3 gain 36
file
ACQUISITION exp 26
sv 0168.6 pu19 7.896
at 3.809 a1Fa 6.600
op 25813
rl 2889
sc 1
d1 3.460 ep
nt 4
ct 4
TRANSMITTER Fr not used
In HI DISPLAY
SfFq 499.777 sp -278.6
tof -680.1 wp 4188.4
tper 2.8 rf 278.8
pw 3.960 rfa 8
DECOUPLER tp 17.8
dn C13 lp 14.2
dof 0
de nmc uc 258
dam c uc 8
dpar 47 vs 117
def 22222 th 4
mm ph

```

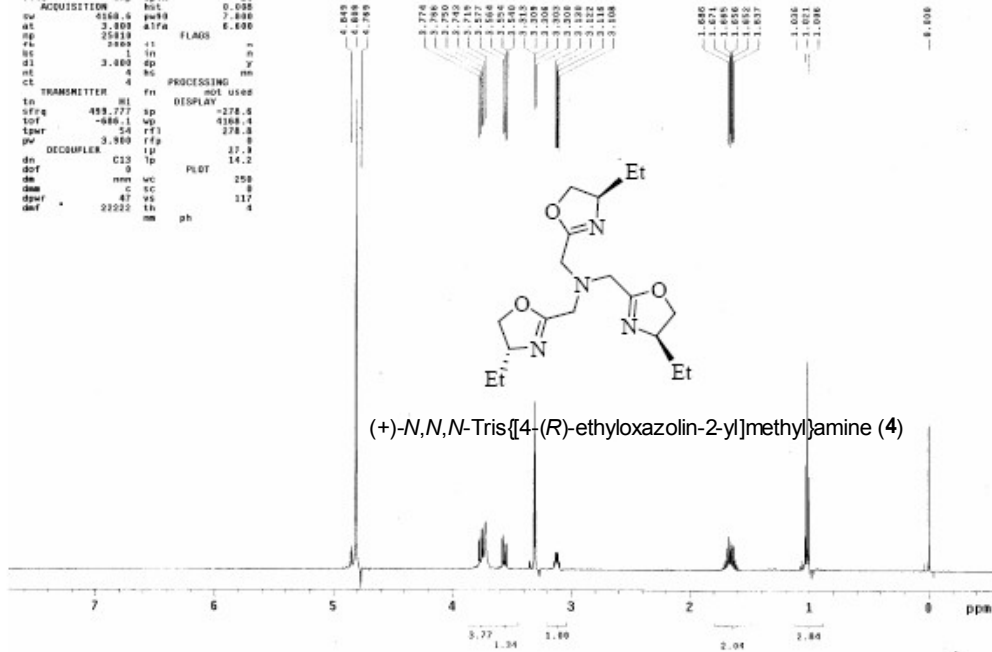



LC710-5\_031208103334 #376 RT: 11.36 AV: 1 NL: 1.05E4  
 T: +c Full ms2 351.00@0.00 [ 150.00-2000.00]

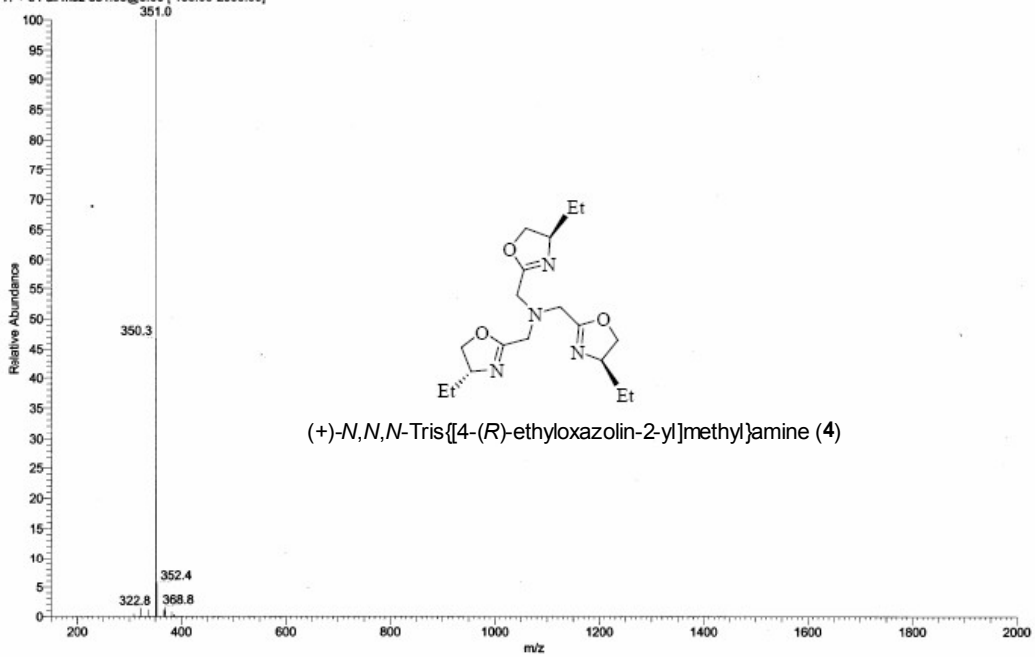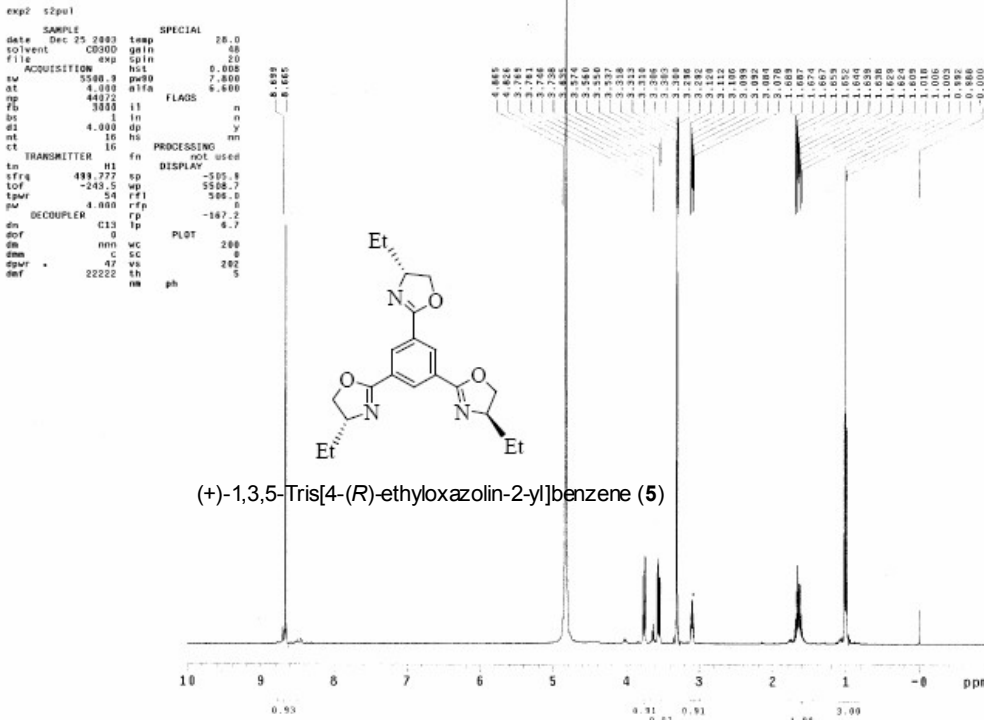

Lc1002-1 #49 RT: 1.45 AV: 1 NL: 1.42E4  
T: + c Full ms2 370.00@0.00 [ 100.00-2000.00]

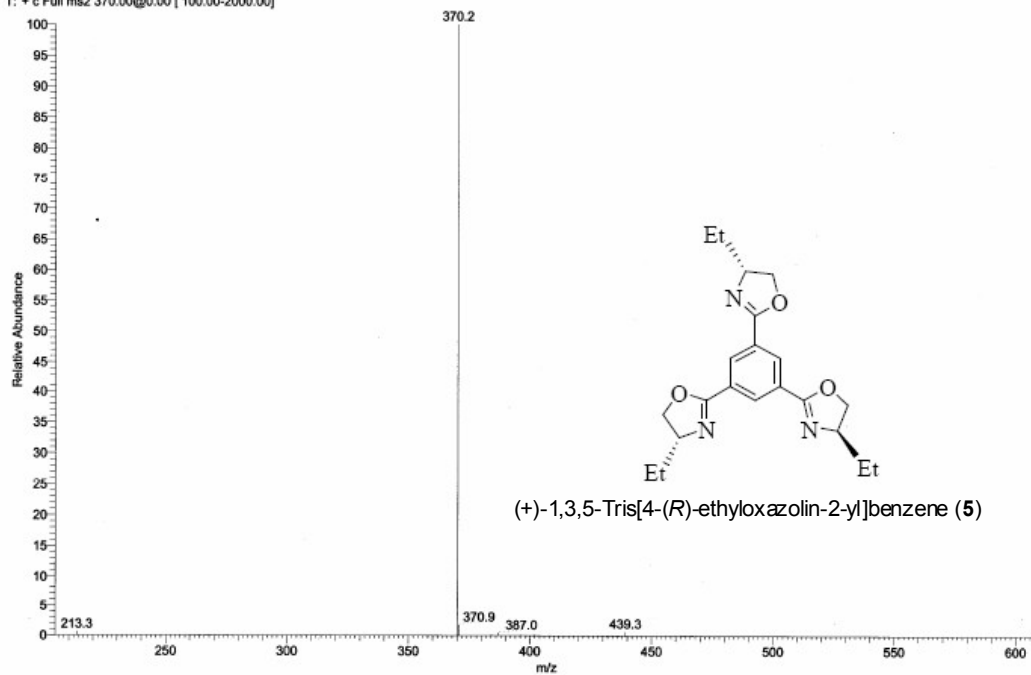

```

v2283h-LC202
exp2 s2pu1
SAMPLE
data Oct 30 2003 temp SPECIAL 28.0
solvent CD300 gain 30
file CDS00 spin 20
ACQUISITION hst 0.000
sw 5671.7 pw90 7.800
nt 2.000 atr 0
sp 22858
fb 3000 ll
bs 1 ln
ds 3.000 dp y
nt 8 hs
ct TRANSMITTER 8 fn PROCESSING NOT USED
IN
sfrq 499.777 sp DISPLAY
tof -134.1 wp -477.4
tpwr 54 rf1 477.7
pw 4.000 rfp 0
rcmplr 0 rp -1.2
dn C13 lp -2.2
sdf 0
da mms wc PLDT
dms C ec 200
dpr 47 vs 200
daf 22222 th 8
im pl 8

```

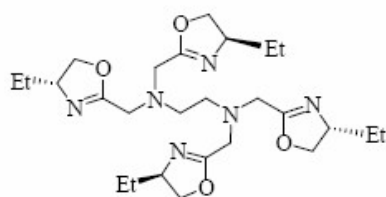

(+)-*N,N,N',N'*-Tetrakis[4-(*R*)-ethyloxazolin-2-yl]methyl]ethylenediamine (**6**)

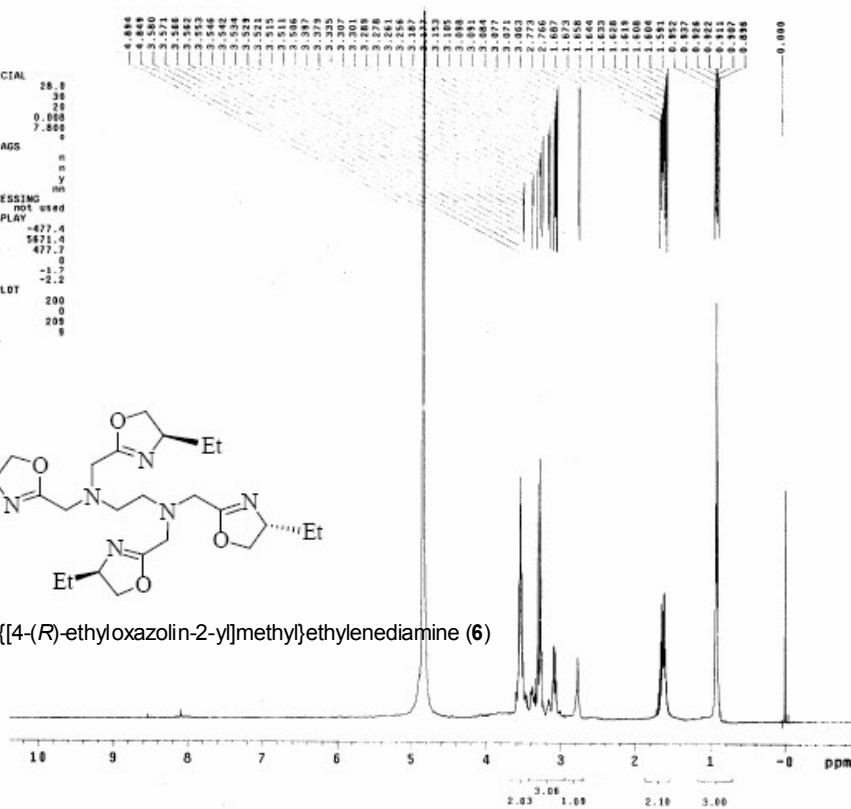

LC201-1 #29 RT: 0.78 AV: 1 NL: 1.35E8  
T: +o Full ms [150.00-2000.00]

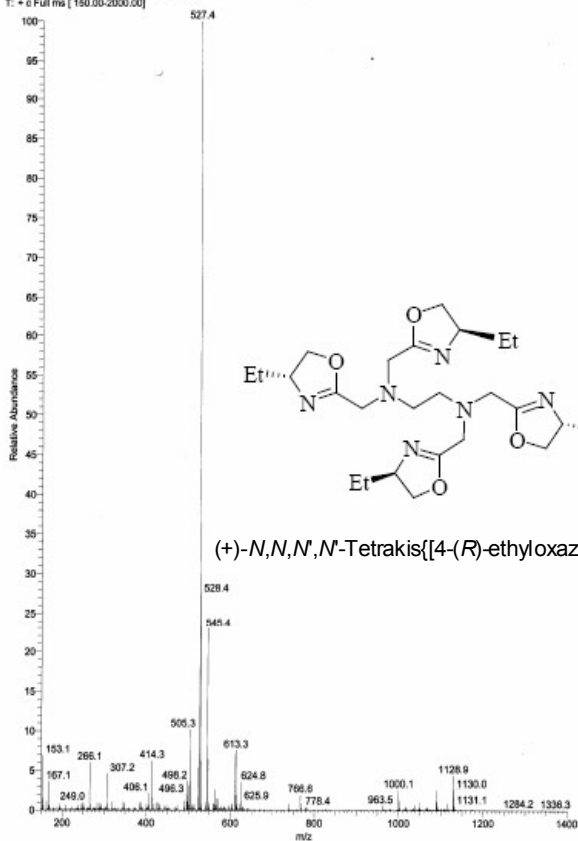

(+)-*N,N,N',N'*-Tetrakis[4-(*R*)-ethyloxazolin-2-yl]methyl]ethylenediamine (**6**)

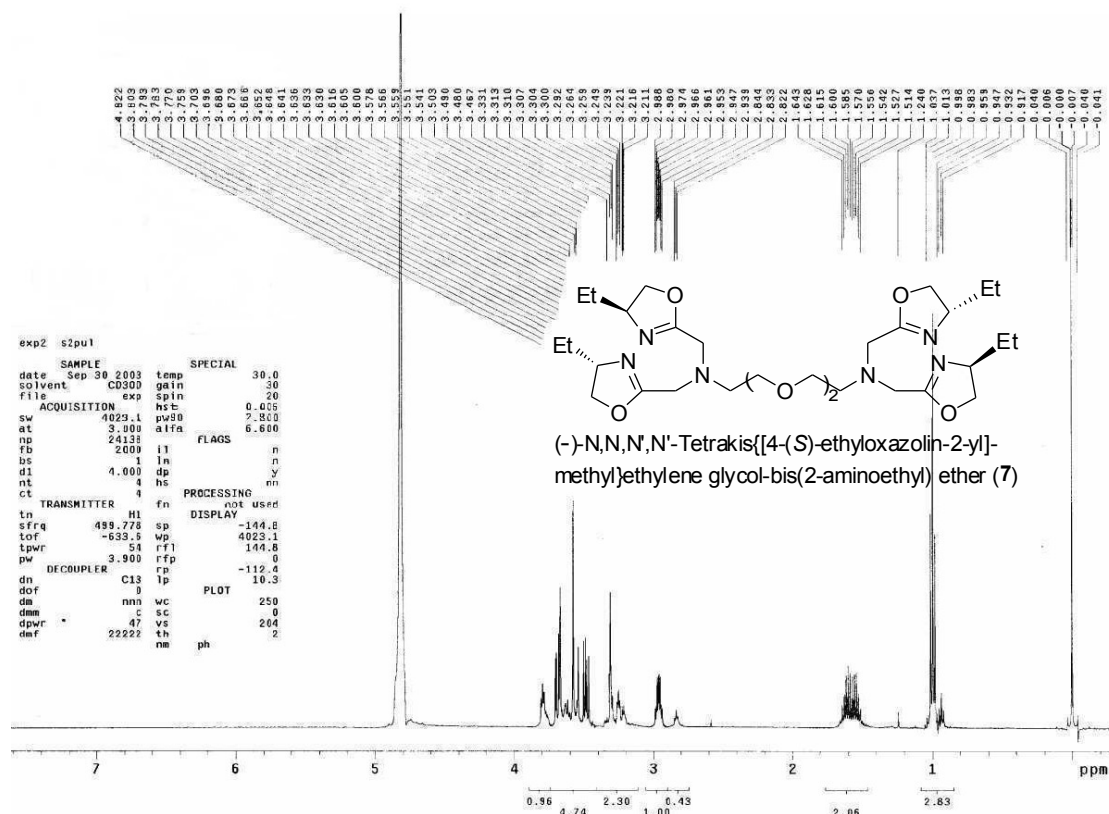

Lc502 #49 RT: 1.47 AV: 1 SB: 24 0.65-1.35 NL: 3.16E5  
T: -c Full ms [160.00-2000.00]

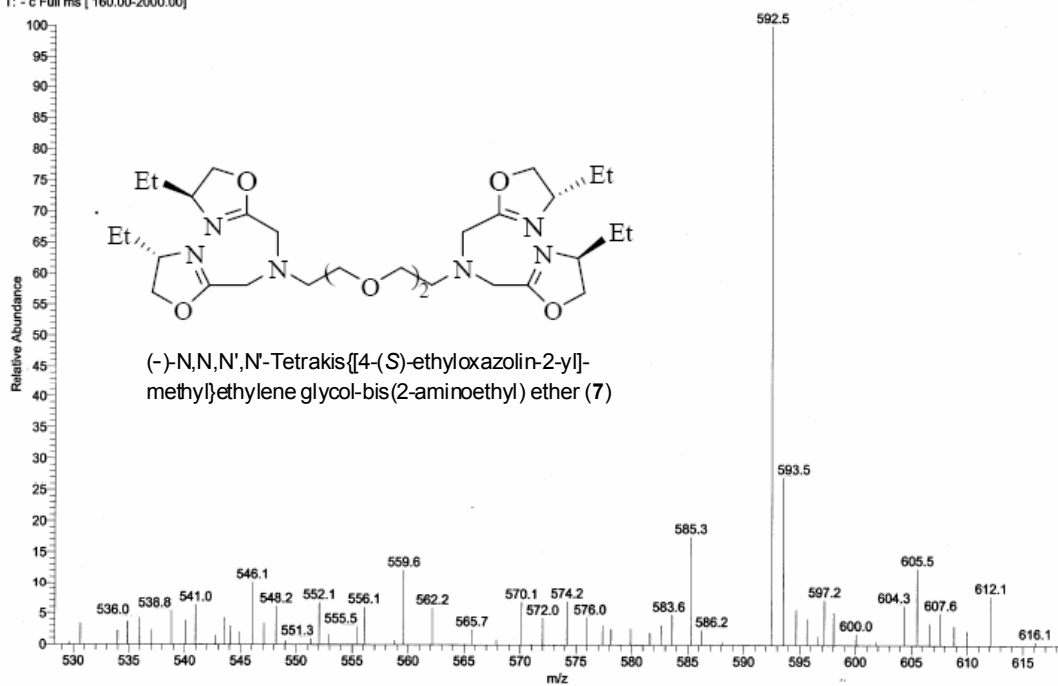

Supplement: Additional file 1 [file 1860-5397-6-29-S1.pdf]
